# Supplementary material for: Lysinibacillus spp.: an IAA-producing endospore forming-bacteria that promotes plant growth
Source: PubMed Central journal article supplement (PMC10257616; doi:10.1007/s10482-023-01828-x), 2023-05-03

# ***Lysinibacillus spp.*: An IAA-producing endospore forming-bacteria that promotes plant growth.**

**Journal: Antonie van Leeuwenhoek  
Journal of Microbiology**

Manuel Pantoja-Guerra [iD](#)<sup>1,2\*</sup>, Marleny Burkett-Cadena<sup>3</sup>, Johanna Cadena<sup>3</sup>, Christopher A Dunlap [iD](#)<sup>4</sup> Camilo A. Ramírez<sup>1</sup>

<sup>1</sup>Universidad de Antioquia, Instituto de Biología, Medellín – Colombia

<sup>2</sup>Corporación Universitaria Lasallista, Caldas, Antioquia – Colombia

<sup>3</sup>Plant Response Biotech, Plant City, FL, USA

<sup>4</sup>United States Department of Agriculture, Agricultural Research Service, National Center for Agricultural Utilization Research, Crop Bioprotection Research Unit, 1815 N University, Peoria, IL, USA

\*Corresponding author: [manuel.pantojag@udea.edu.co](mailto:manuel.pantojag@udea.edu.co)

## **Supplementary material 1.**

Inoculation effect of *Lysinibacillus spp.* strains on Zea mays ICA-109 growth. A) PB211. B) PB293. C) PB300. D) PB512. E) CBP678. F) CBP1002. G) CBP1617. H) CBP1619. I) CBP1621. J) CBP1622. K) CBP1624. L) CBP1140. The strains labeled with red color show PGPR effect. The experiment was done in duplicate, and it was analyzed as blocking by time. The red points correspond to block 1 data, while block 2 data are represented by blue points. The data were analyzed using the ANOVA test, and the comparison of means with Dunnett's test was calculated. The treatments presented differences with statistical significance are marked with their respective P-value. Data roots were taken using digital image analysis with the Smart-Root package (Lobet et al, 2011; 2015).

## **Total dry weight.**

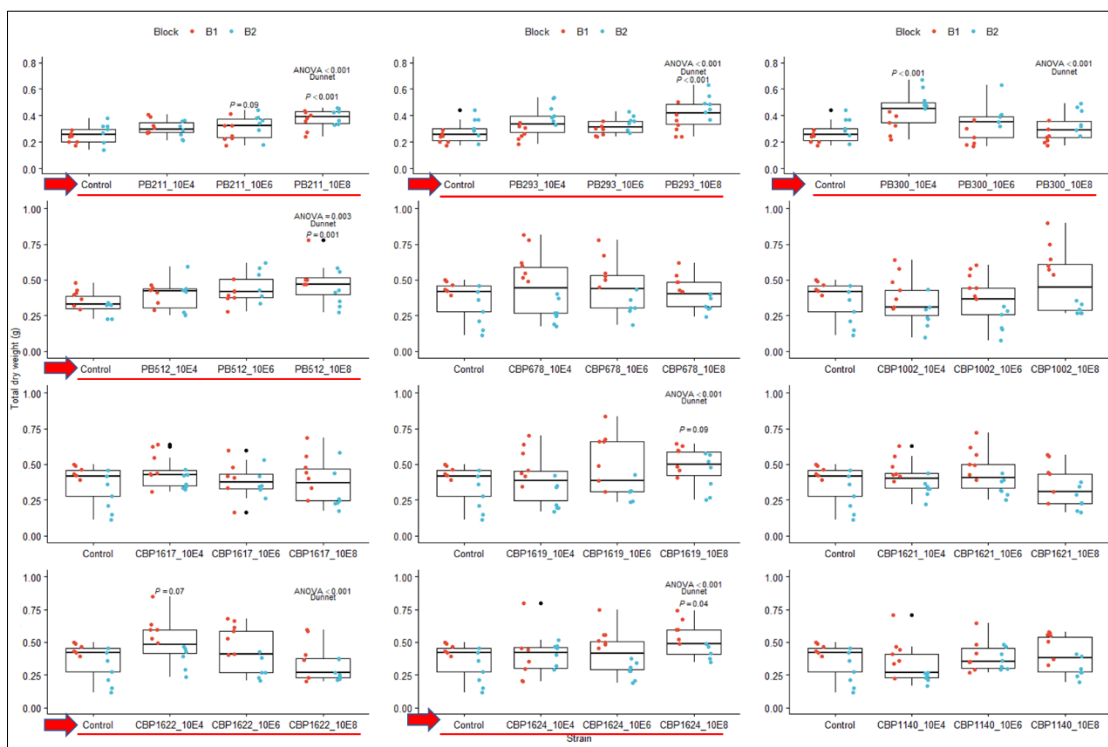

## Number of main roots

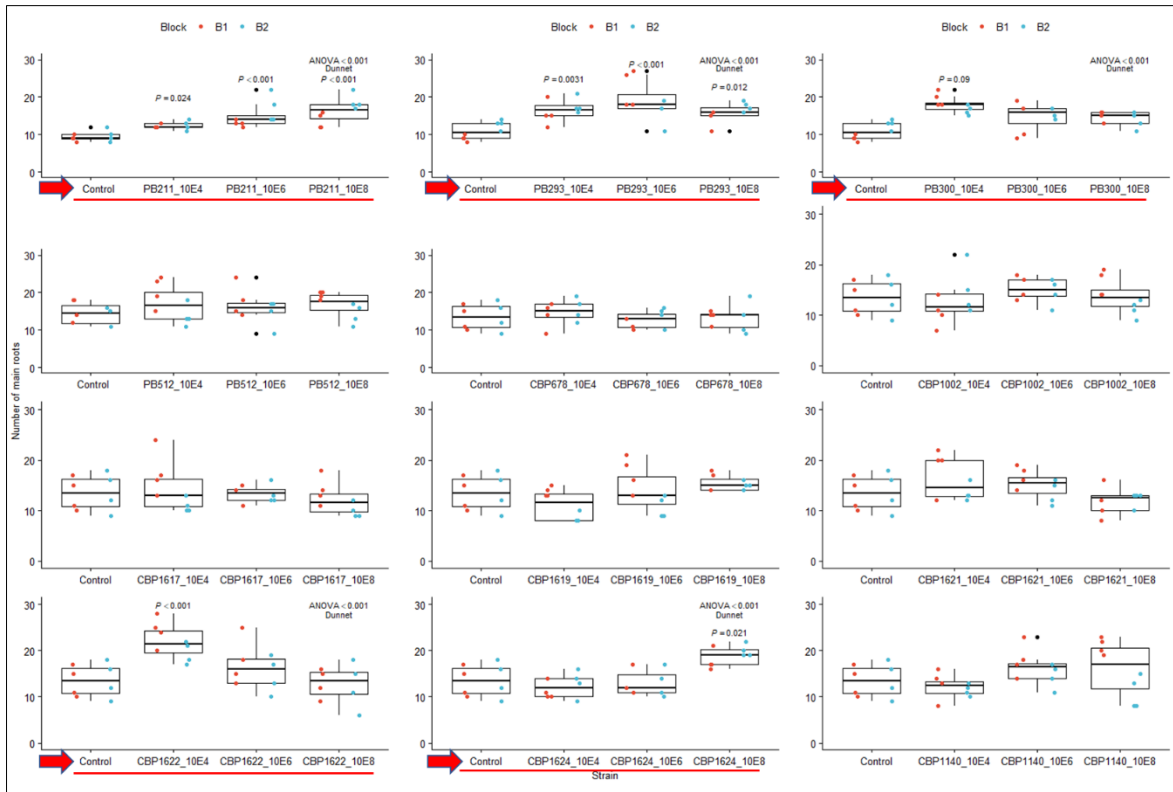

## Total root length

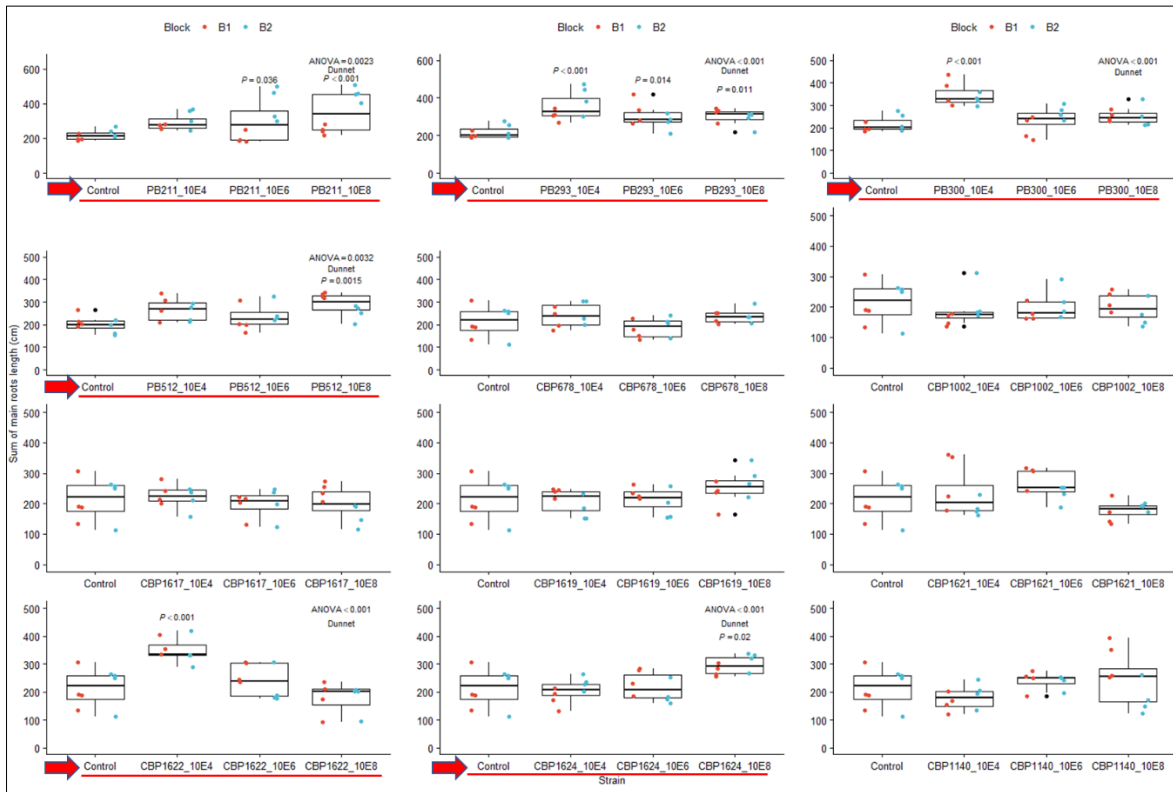

## Number of lateral roots

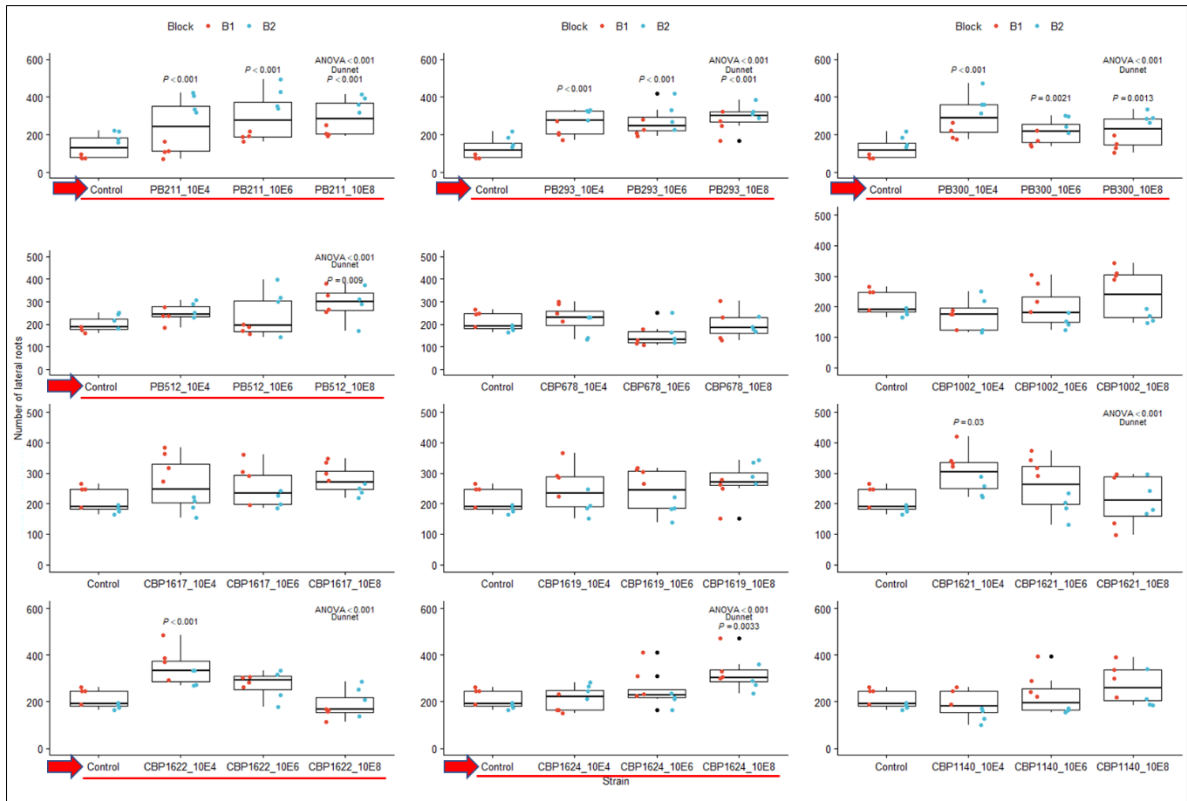

## Convex hull area

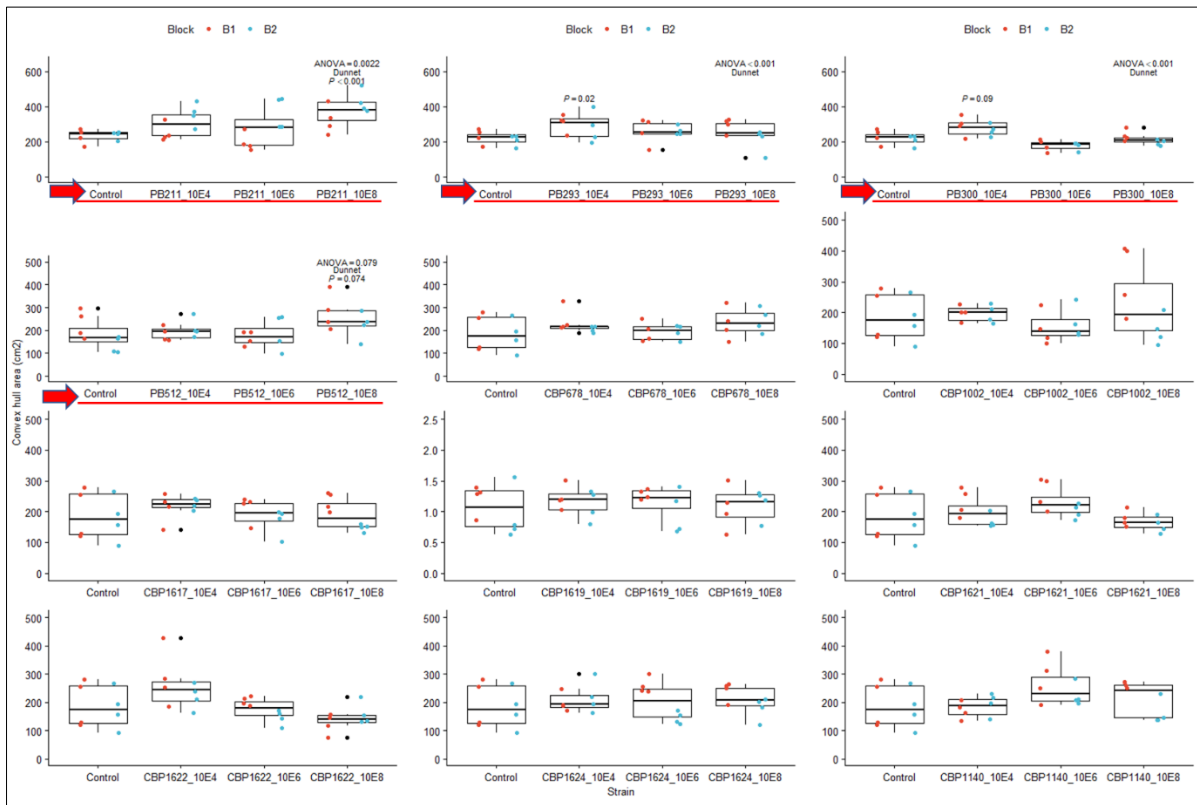

Supplement: 10482_2023_1828_MOESM1_ESM.pdf [file 10482_2023_1828_MOESM1_ESM.pdf]
