# Supplementary material for: Lysinibacillus spp.: an IAA-producing endospore forming-bacteria that promotes plant growth
Source: PubMed Central journal article supplement (PMC10257616; doi:10.1007/s10482-023-01828-x), 2023-05-03

***Lysinibacillus* spp.: An IAA-producing endospore forming-bacteria that promotes plant growth.**

**Journal: Antonie van Leeuwenhoek  
Journal of Microbiology**

Manuel Pantoja-Guerra [iD](#)<sup>1,2\*</sup>, Marleny Burkett-Cadena<sup>3</sup>, Johanna Cadena<sup>3</sup>, Christopher A Dunlap [iD](#)<sup>4</sup> Camilo A. Ramírez<sup>1</sup>

<sup>1</sup>Universidad de Antioquia, Instituto de Biología, Medellín – Colombia

<sup>2</sup>Corporación Universitaria Lasallista, Caldas, Antioquia – Colombia

<sup>3</sup>Plant Response Biotech, Plant City, FL, USA

<sup>4</sup>United States Department of Agriculture, Agricultural Research Service, National Center for Agricultural Utilization Research, Crop Bioprotection Research Unit, 1815 N University, Peoria, IL, USA

\*Corresponding author: [manuel.pantojag@udea.edu.co](mailto:manuel.pantojag@udea.edu.co)

**Supplementary material 4. Coleoptiles elongation by supernatant filtrates of *Lysinibacillus* spp. Box-plots with data distribution.**

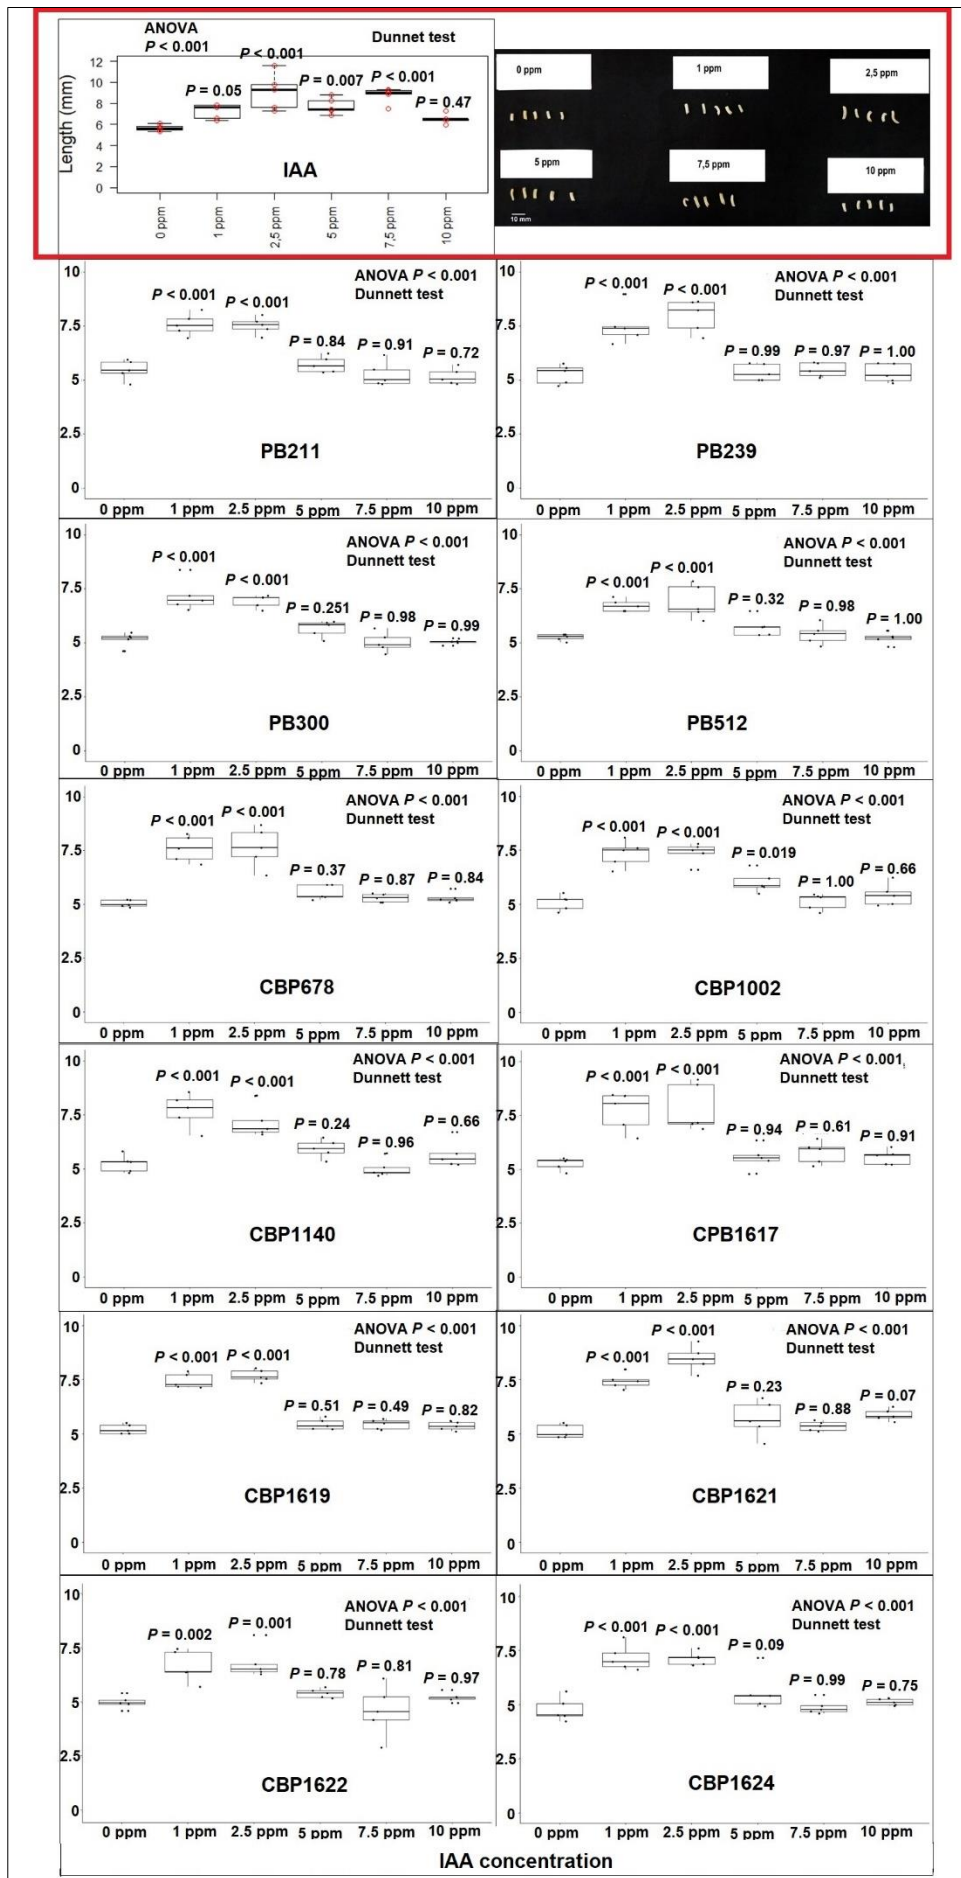

Supplement: 10482_2023_1828_MOESM4_ESM.pdf [file 10482_2023_1828_MOESM4_ESM.pdf]
